# Supplementary material
Source: Springer Nature journal article supplement (https://www.springermedizin.de/resource/supplementary/12916_2012_702_MOESM8_ESM.pdf/9598608)
Supplement: MOESM8 [file 9598608]

Before

After

Average of position

Average of position

Fidelity to Trust (utilitarian) 2.01

Intellectual honesty (utilitarian) 2.33\*

Intellectual honesty (utilitarian) 2.02

Fidelity to Trust (utilitarian) 2.36<sup>ND</sup>

**Benevolence (deontological) 3.63**

**Benevolence (deontological) 2.56\***

Fortitude (aretological) 3.65

Fortitude (aretological) 4.10\*

Compassion (aretological) 4.65

Compassion (aretological) 4.39\*

Courage (aretological) 5.05

Courage (aretological) 5.27\*

ND

ND
